# Supplementary material for: Interplay of tectonic and dynamic processes shaping multilayer extensional system in southern-central Apennines
Source: Springer Nature journal article supplement (doi:10.1038/s41598-024-69118-8), 2024-08-07
Supplement: MOESM2 [file 41598_2024_69118_MOESM2_ESM.pdf]

# Supplementary Material for:

## Interplay of tectonic and dynamic processes shaping multilayer extensional system in southern-central Apennines

Rita de Nardis<sup>1,2,\*</sup>, Alessandro Vuan<sup>3,4</sup>, Luca Carbone<sup>1,2</sup>, Donato Talone<sup>1,2</sup>, Maria Adelaide Romano<sup>3</sup>, Giusy Lavecchia<sup>1,2</sup>

<sup>1</sup> DiSPUTer, University of Chieti-Pescara, via dei Vestini 31, Chieti 66100, Italy

<sup>2</sup> CRUST - Centro interUniversitario per l'analisi SismoTettonica tridimensionale, Chieti, Italy

<sup>3</sup> National Institute of Oceanography and Applied Geophysics – OGS, Trieste, Italy

<sup>4</sup> INGV – Centro Nazionale Terremoti, Istituto Nazionale di Geofisica e Vulcanologia, Roma, Italy

\*Corresponding: [rita.denardis@unich.it](mailto:rita.denardis@unich.it)

### Contents of this file:

1. Figures S1 to S9
2. Tables S1 to S3
3. References

### Additional Supporting Information (File uploaded separately in csv format)

#### *Enhanced catalog*

*enhanced\_catalog.csv*

This supplementary material file contains the following figures with captions.

**Figure S1.** The seismotectonic framework of the study area.

**Figure S2.** Details on historical earthquakes: seismogenic sources from DISS database<sup>1</sup>, the 1654 earthquake revised by<sup>2</sup> with reference therein, and macroseismic field of the 1654 and 1349 earthquakes from DBMI15v4.0<sup>3</sup>.

**Figure S3.** Seismic stations used to build the new catalog by template matching.

**Figure S4.** Characteristics of template and detections of the new catalog: repeaters and multiplets.

**Figure S5.** Magnitude vs time, coefficient variation of interevent times, and seismic moment ratio evaluated for CL-1, CL-2-3, and SO-1-SO-3.

**Figure S6.** Cumulative number of events and depth distribution vs time for CL-1, CL-2-3, and SO-1-SO-3.

**Figure S7.** Depth distribution of each cluster CL-1, CL-2-3, and SO-1-SO-3.

**Figure S8.** The main characteristics of ground motions recorded at the Italian strong motion and the Italian seismic networks after the  $M_w$  6.3 L'Aquila earthquake.

**Figure S9.** Spectrograms of the main event of the Sora earthquake  $M_w$  4.8, as recorded at some Italian seismic stations.

**Table S1.** Main characteristics of the analyzed clusters.

**Table S2.** The values of  $V_p/V_s$  and diffusivity (D) along with their uncertainties.

**Table S3.** Average focal mechanisms and kinematics axes for each cluster.

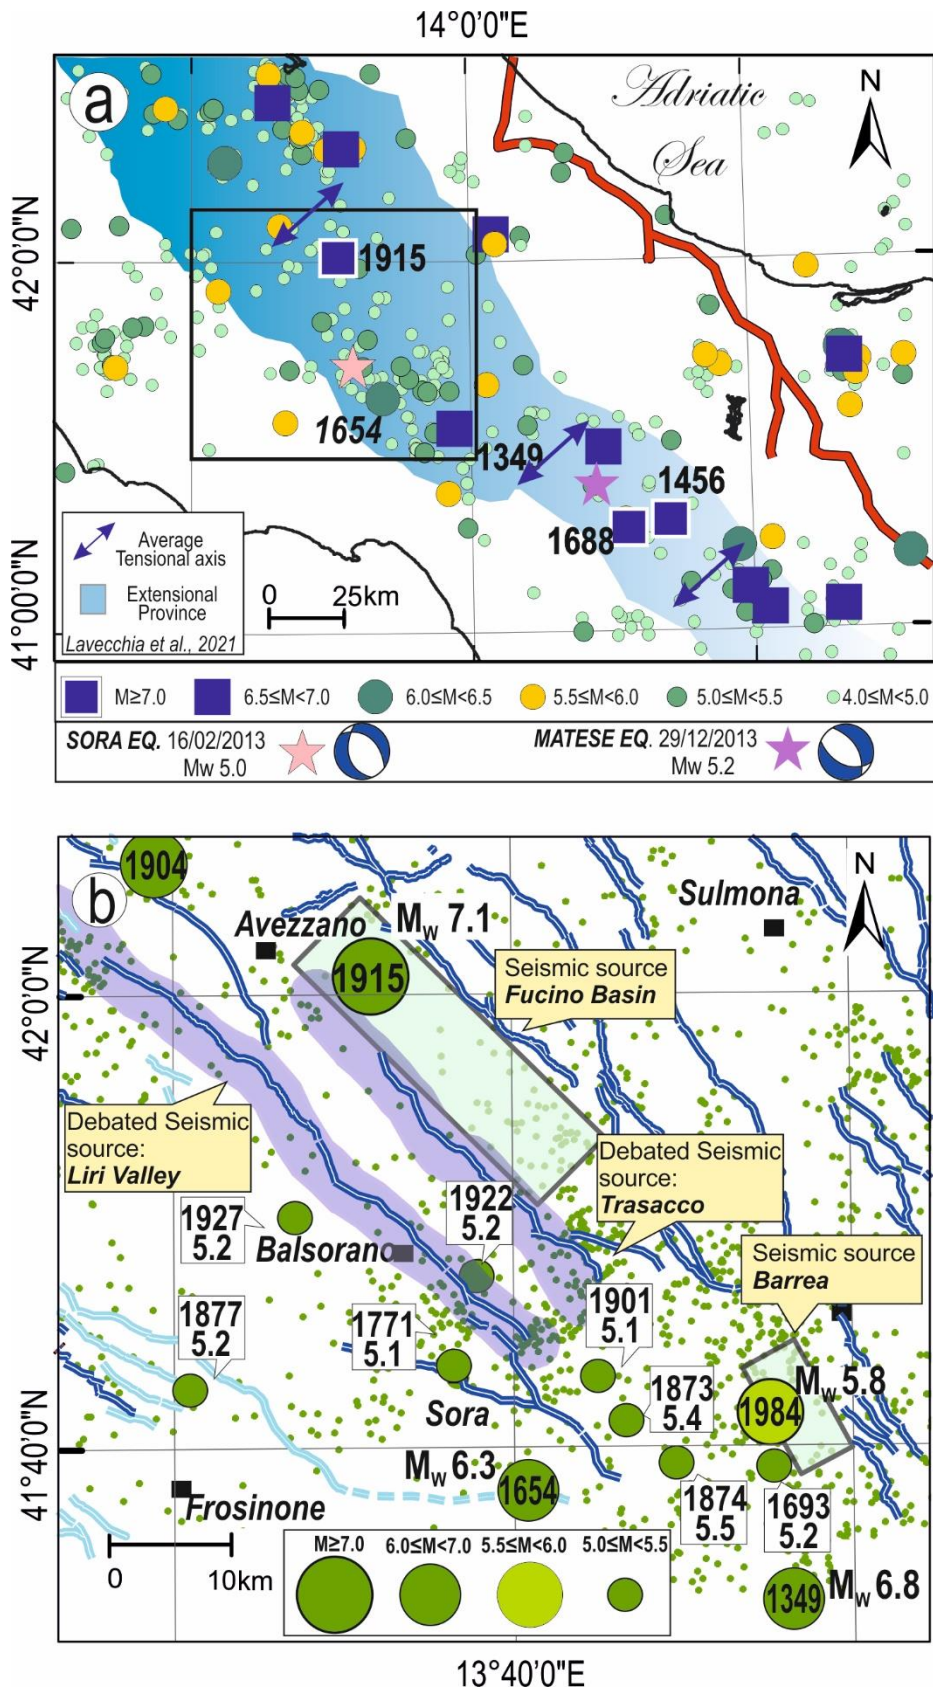

**Figure S1.** The seismotectonic framework of the study area. (a) Extensional Province from <sup>5</sup>, and major historical and instrumental earthquakes from CPTI15v4 <sup>6,7</sup>. The red line represents the Outer Thrust Front (OTS). (b) Historical and instrumental seismicity map, active faults from QUIN database <sup>8-10</sup>, and individual (light green rectangles) and debated (purple areas) seismicogenic sources as reported by DISS <sup>1</sup>. The date and magnitude of the seismic events with  $5.0 \leq M_w \leq 5.5$  are detailed, while minor seismicity  $M_w < 5.0$  is reported without labels.

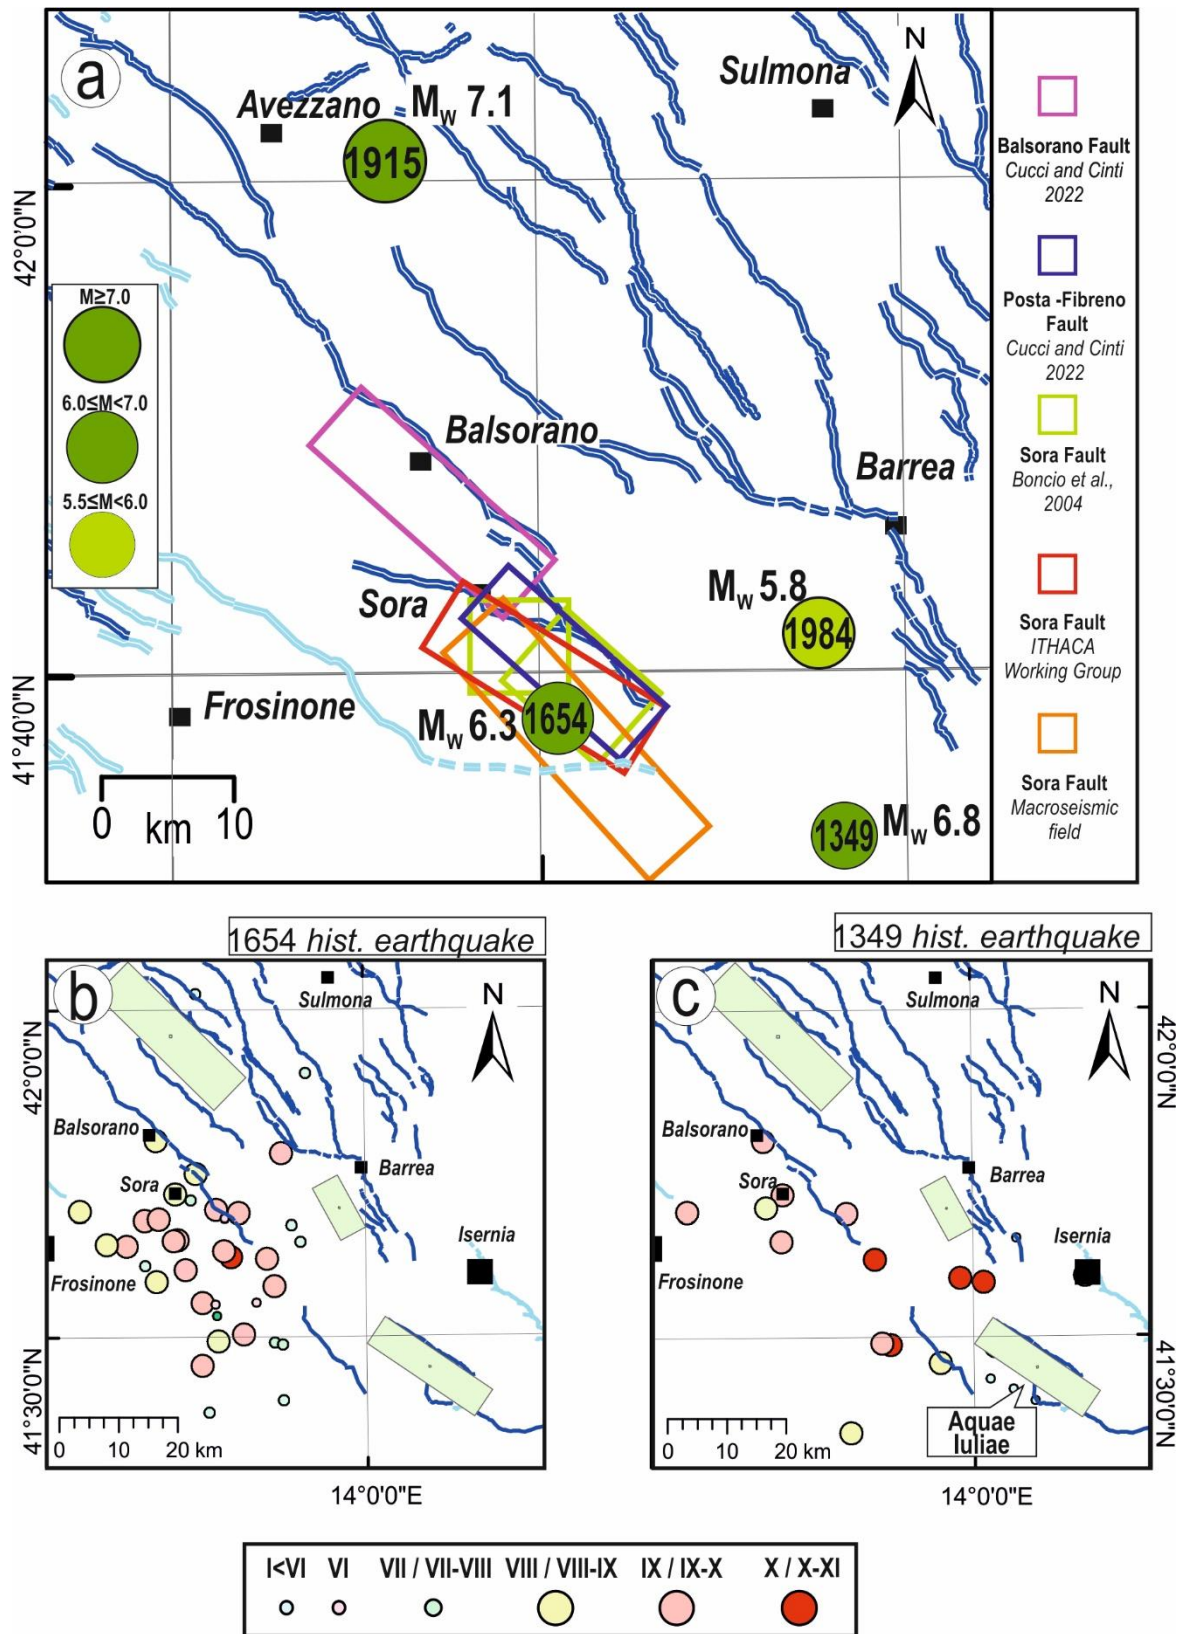

**Figure S2.** Active faults (as in Fig. S1) and some details on historical earthquakes. (a) Seismogenic sources of the 1654 were reported by <sup>2</sup> and referenced therein. (b-c) Macroseismic fields of the 1654 and 1349 earthquakes from DBMI15v4.0 <sup>3</sup> combined with the individual seismogenic source proposed by DISS <sup>1</sup>.

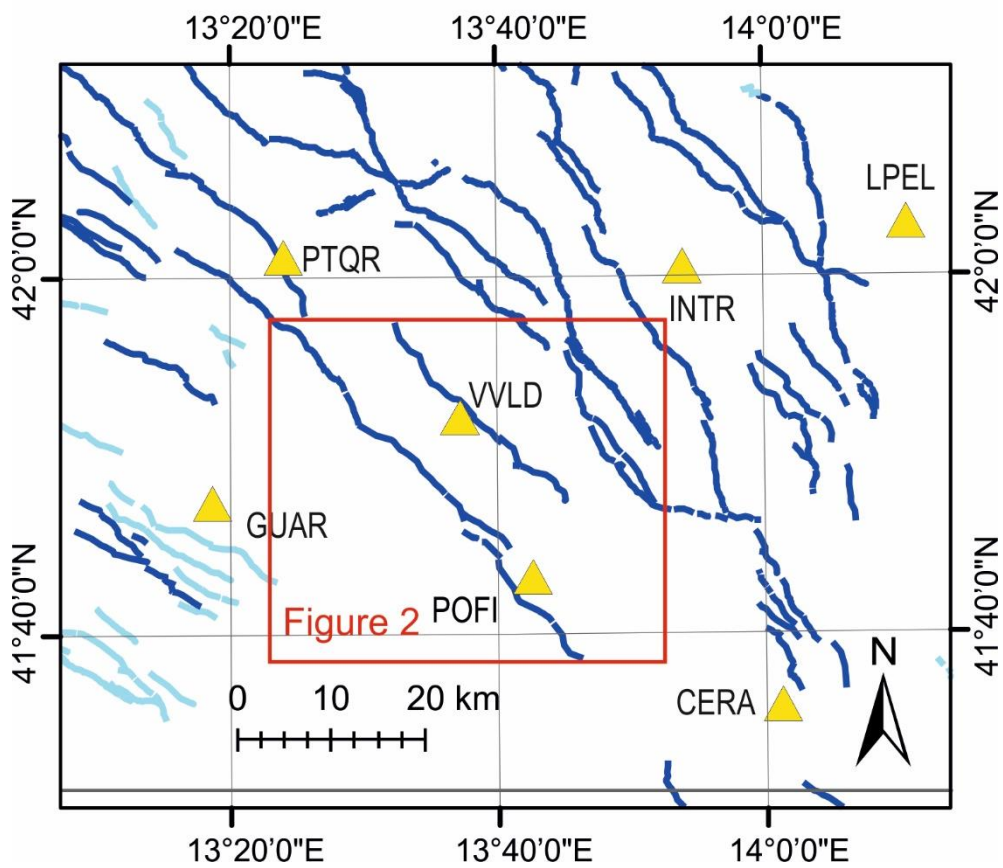

**Figure S3.** Map of the seven permanent seismic stations (yellow triangles) belonging to the Italian seismic network used for constructing the enhanced catalog. The red rectangle represents the study area shown in Figure 2.

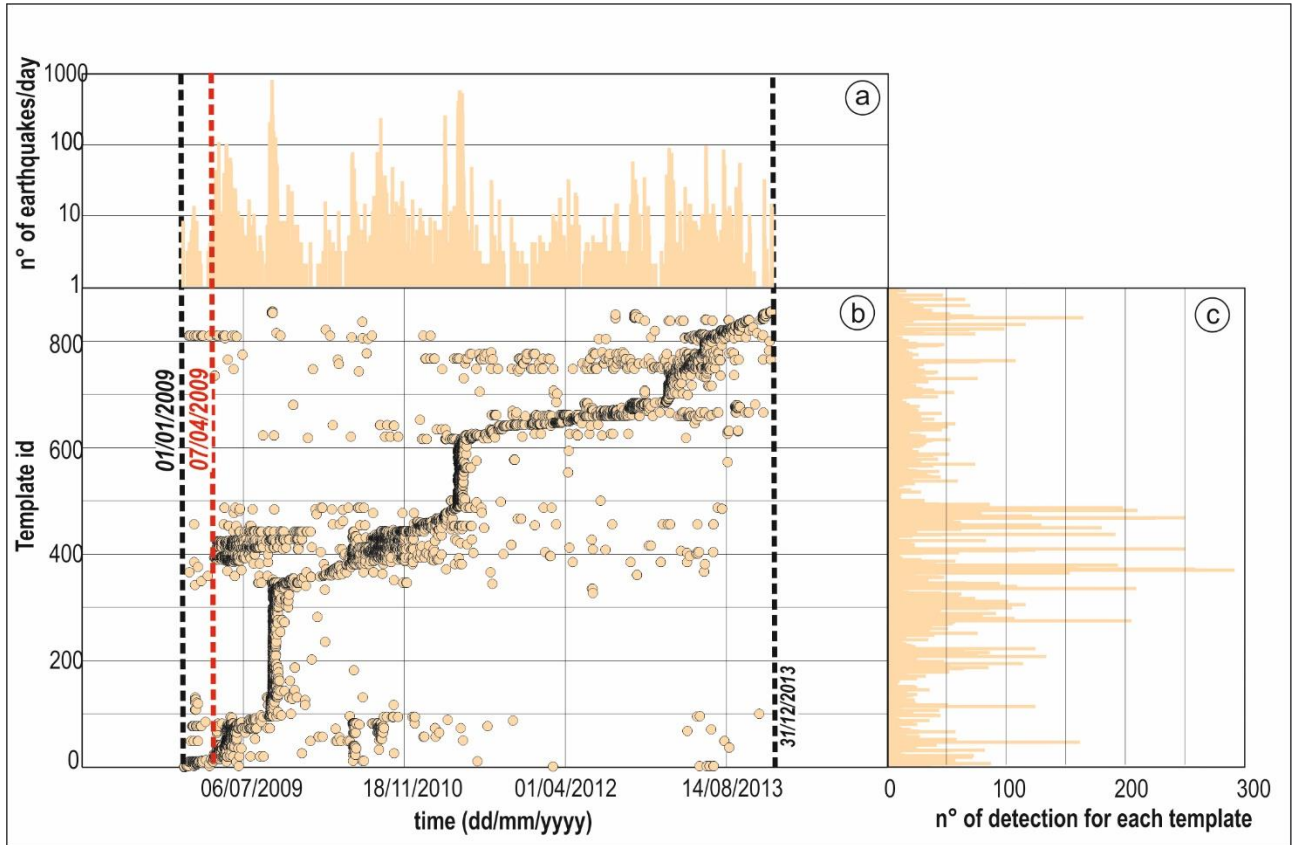

**Figure S4.** Templates and detections versus time: the new catalog. (a) Daily frequency of earthquakes of the new catalog. (b) Relation between the templates (id 1-856) and new detections versus time. (c) Number of detections for each template.

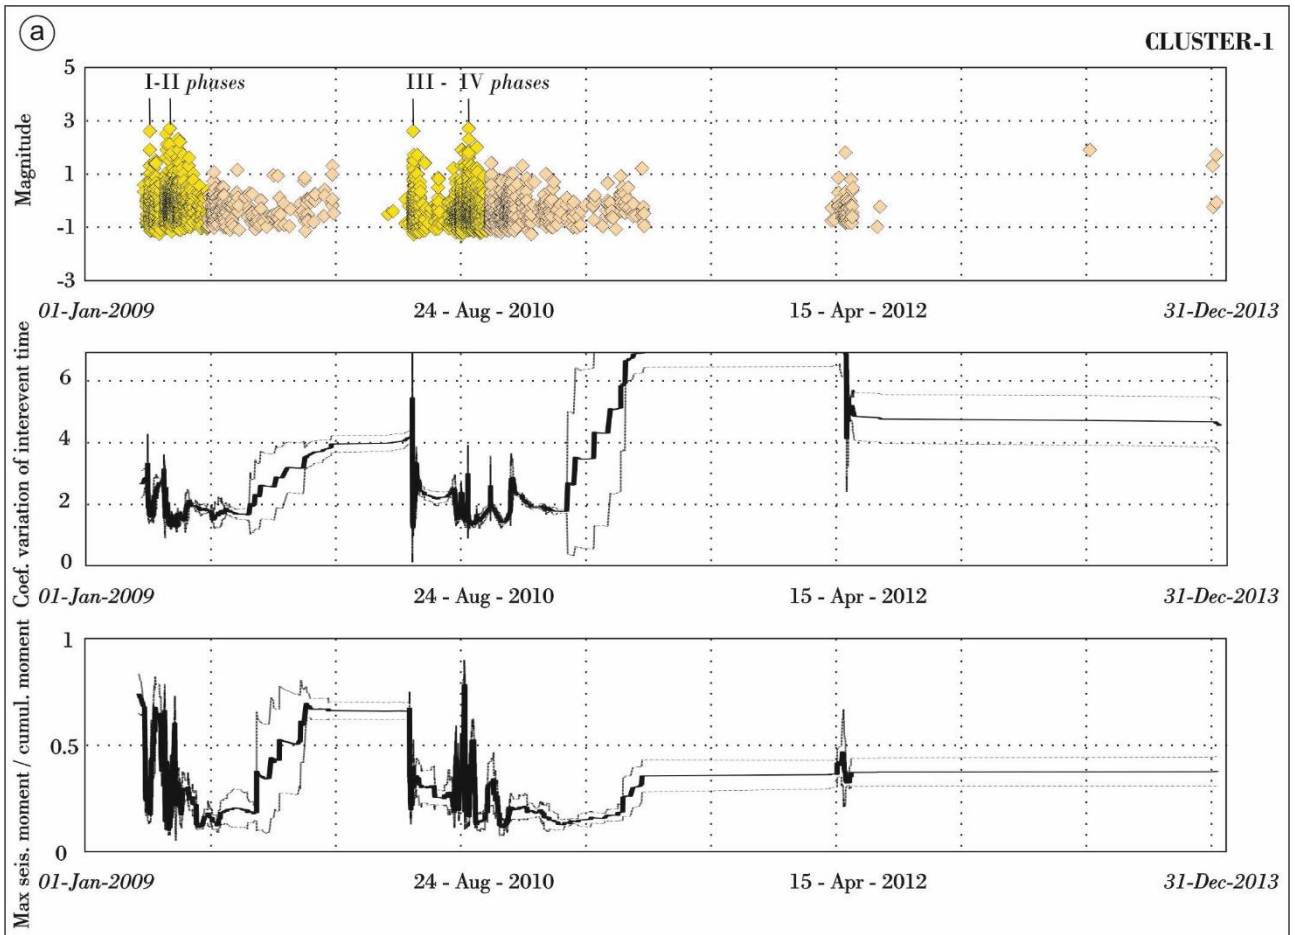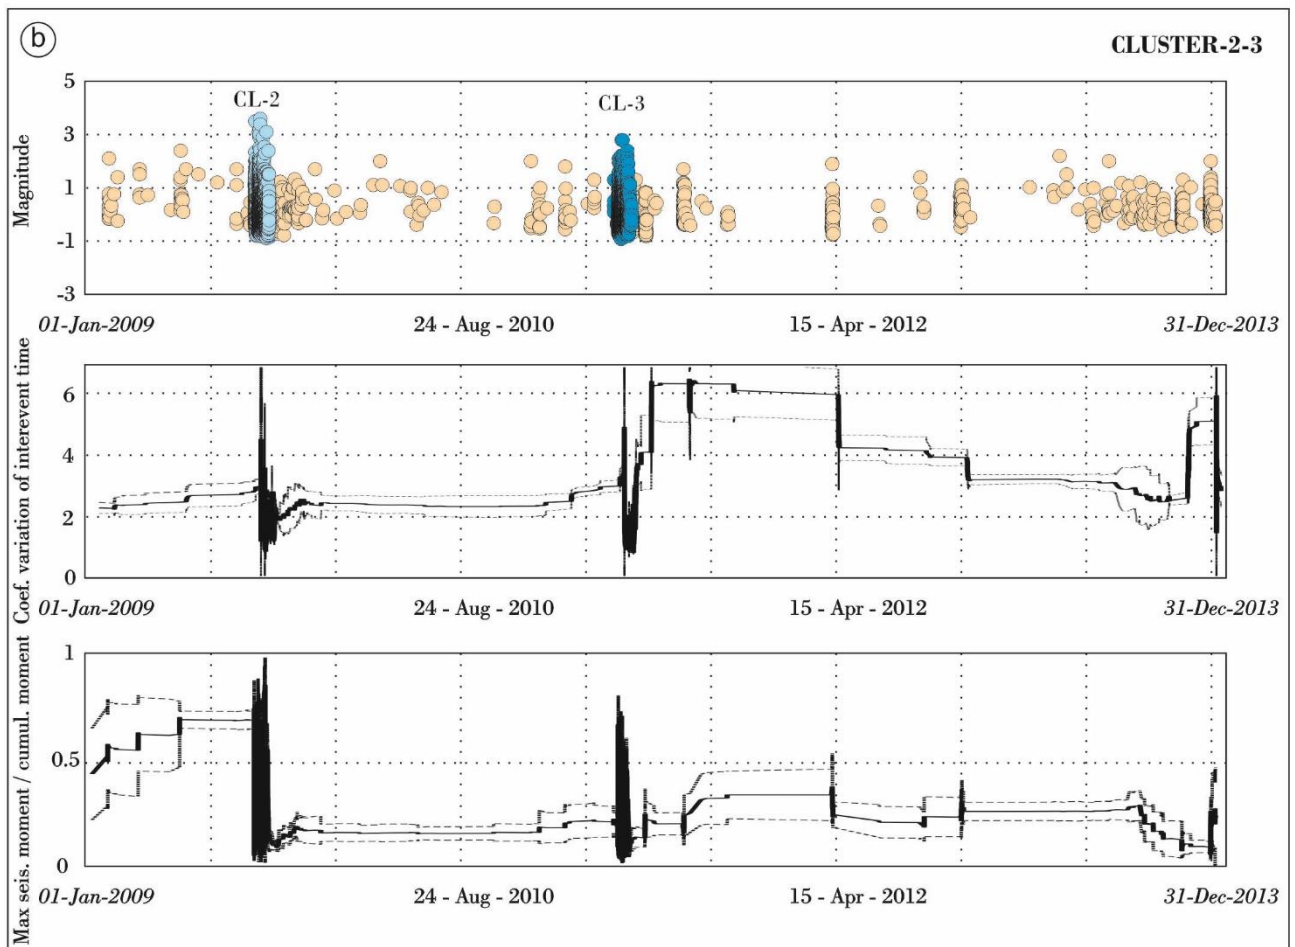

CONTINUED

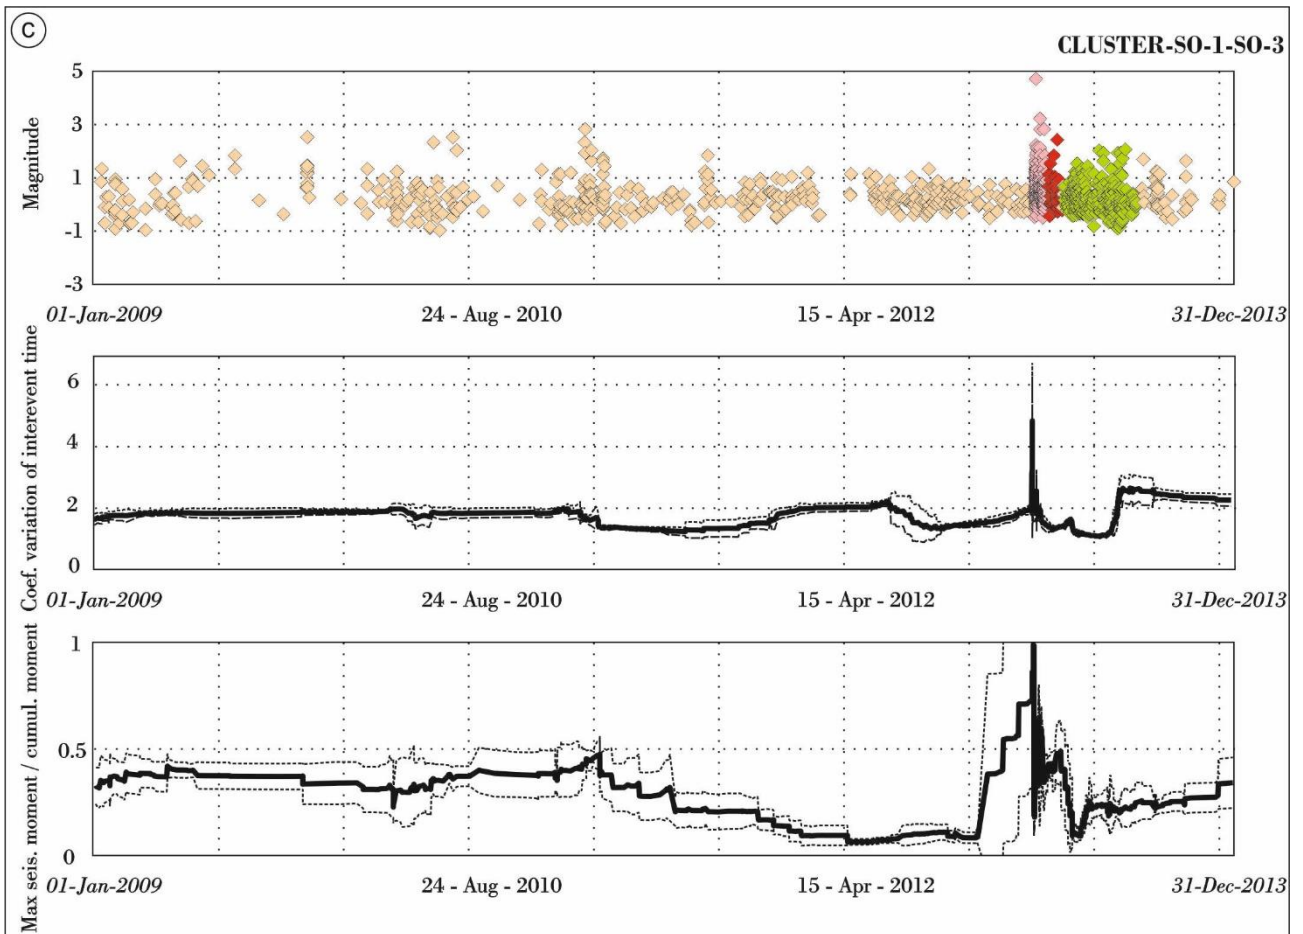

**Figure S5.** Magnitude versus time, coefficient variation of interevent times, and seismic moment ratio evaluated for CL-1 (a), CL-2,3 (b), and SO-1-SO-3 (c) and the new catalog.

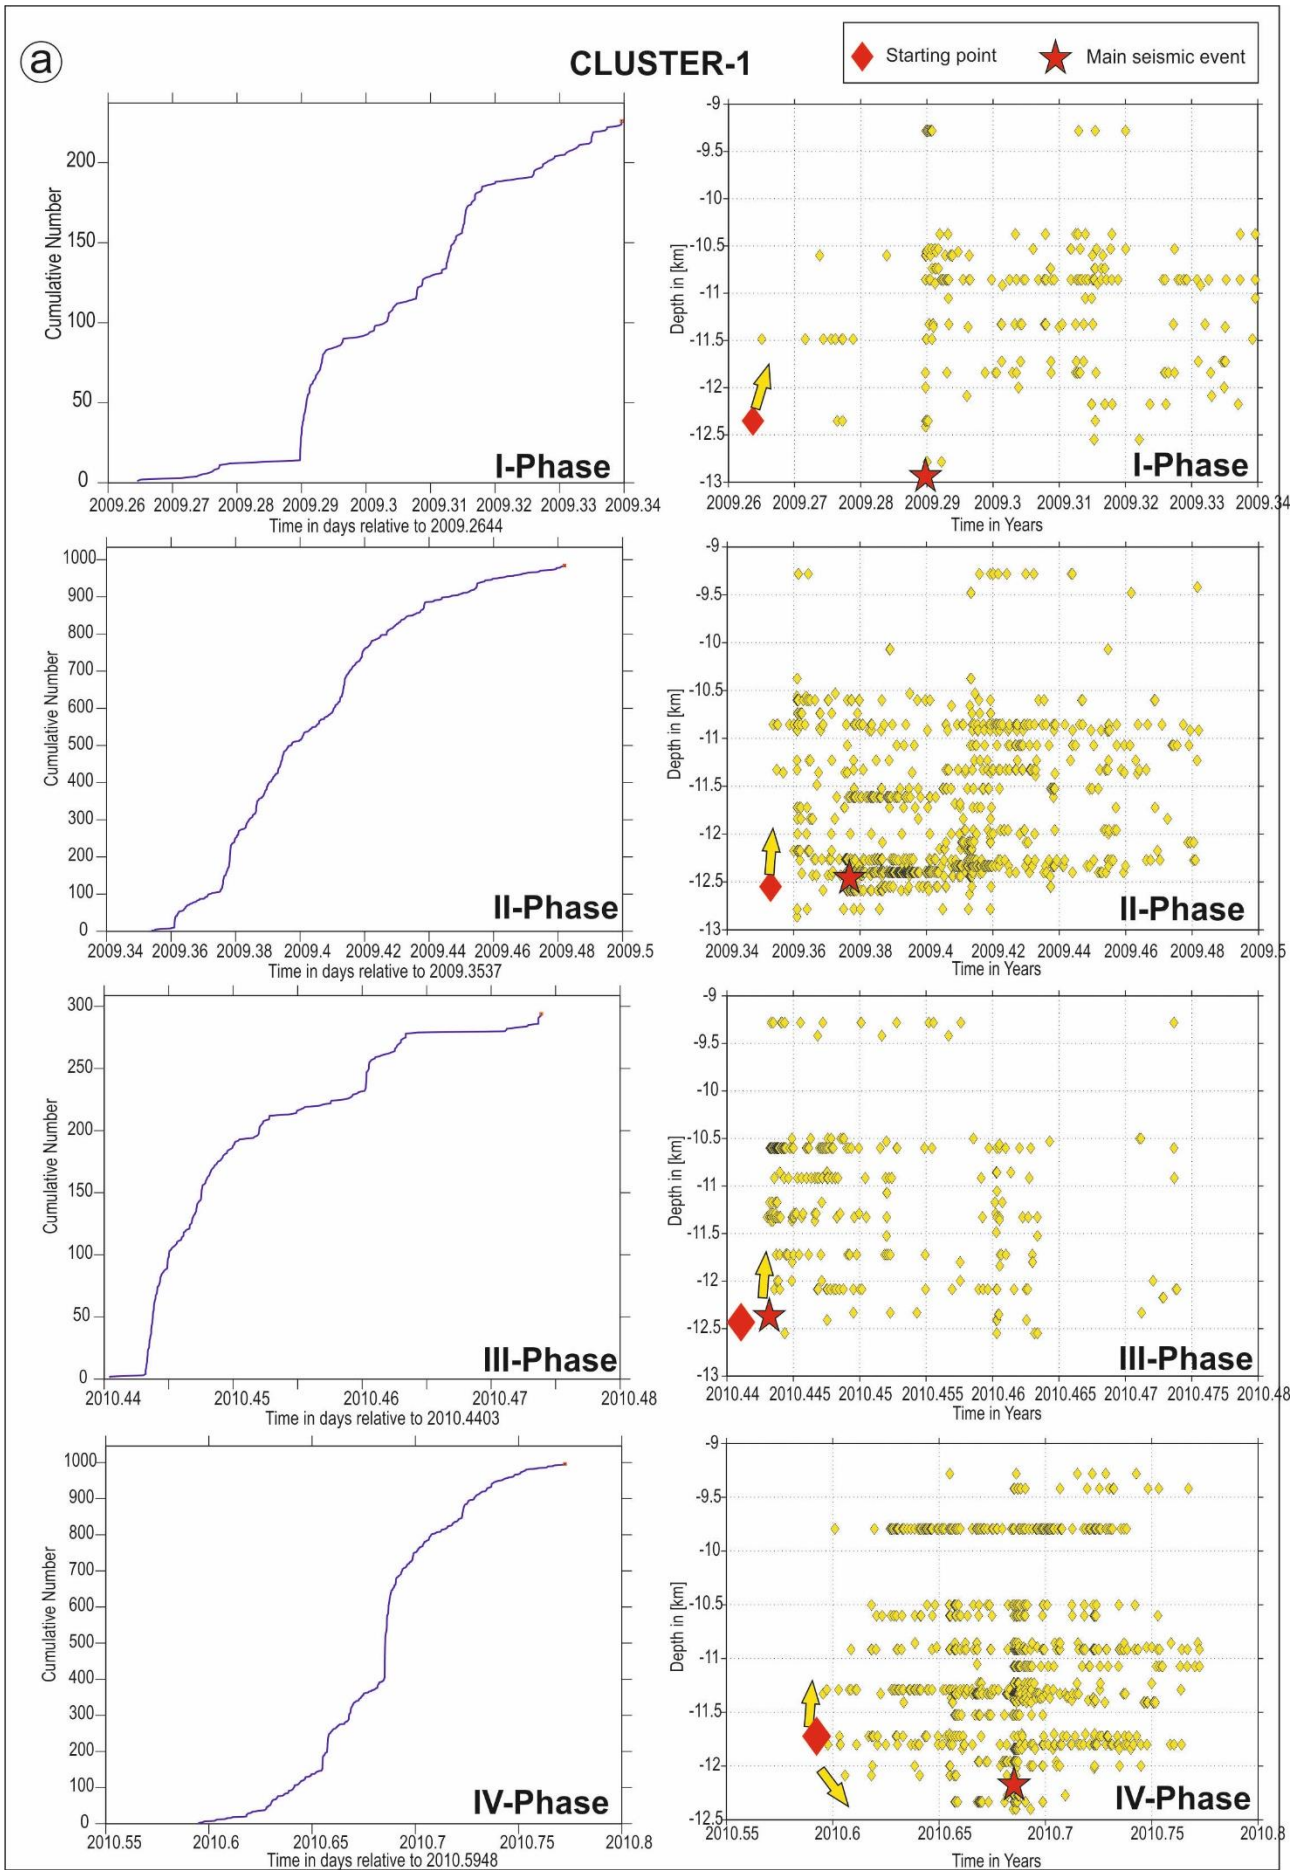

CONTINUED



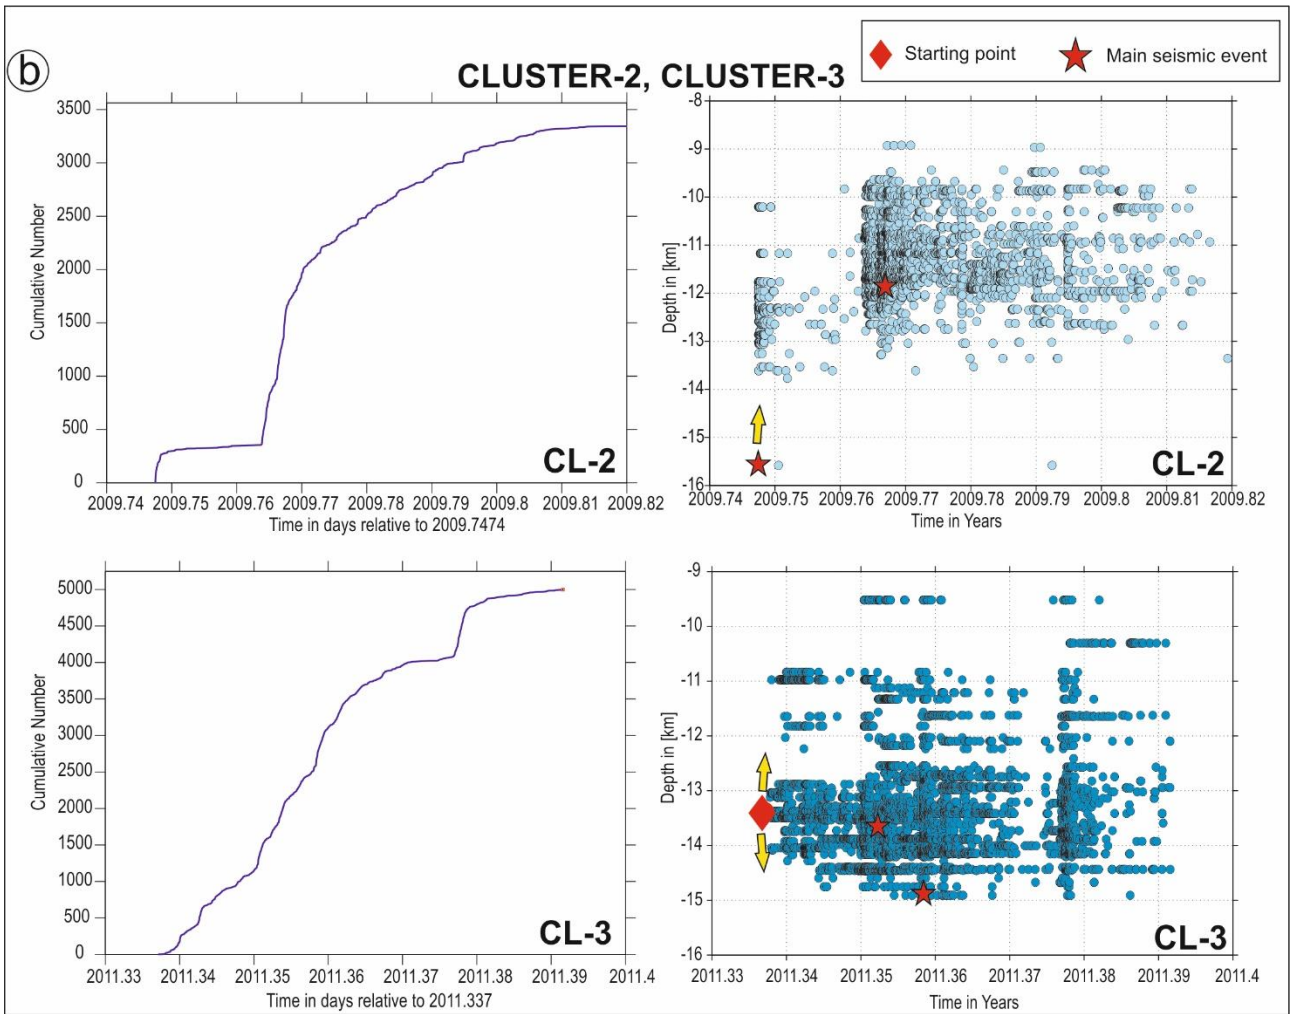

**CONTINUED**

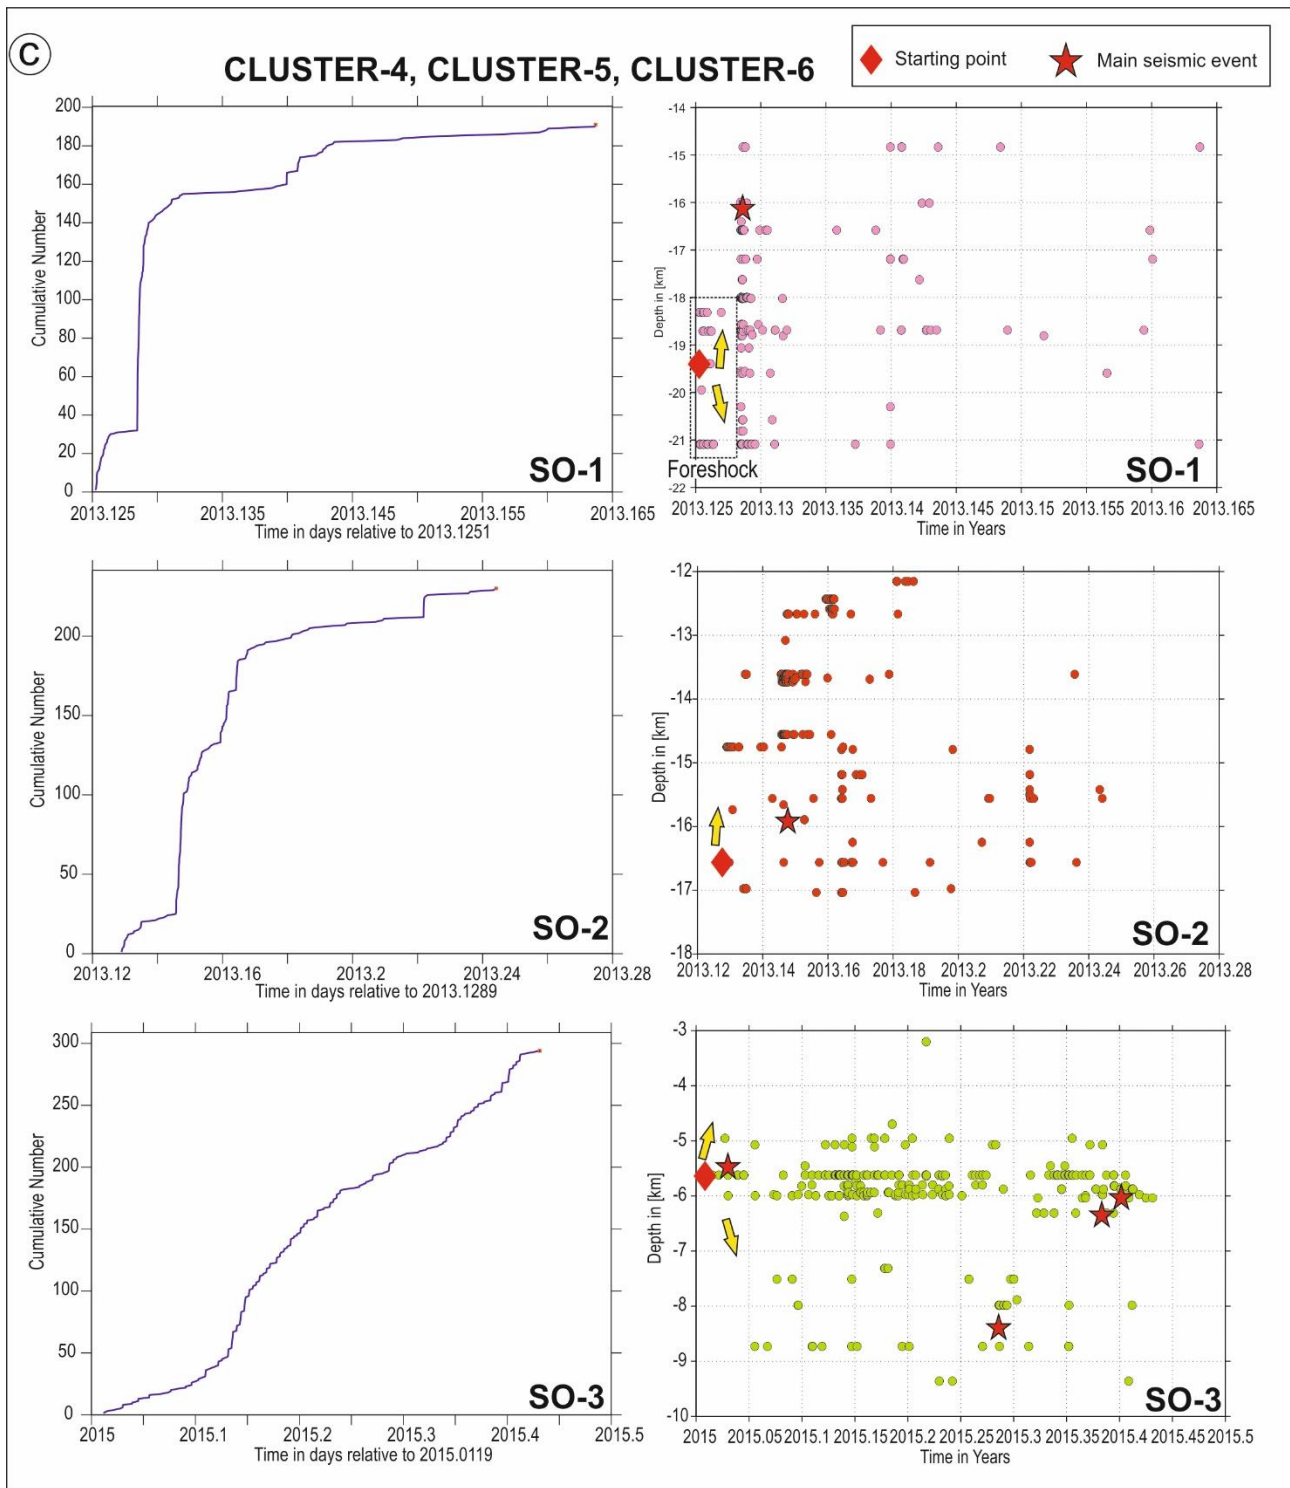

**Figure S6.** Cumulative number of events and depth distribution vs time for CL-1 (a), CL-2,3 (b), and SO-1-SO-3 (c) evaluated starting from the new catalog.

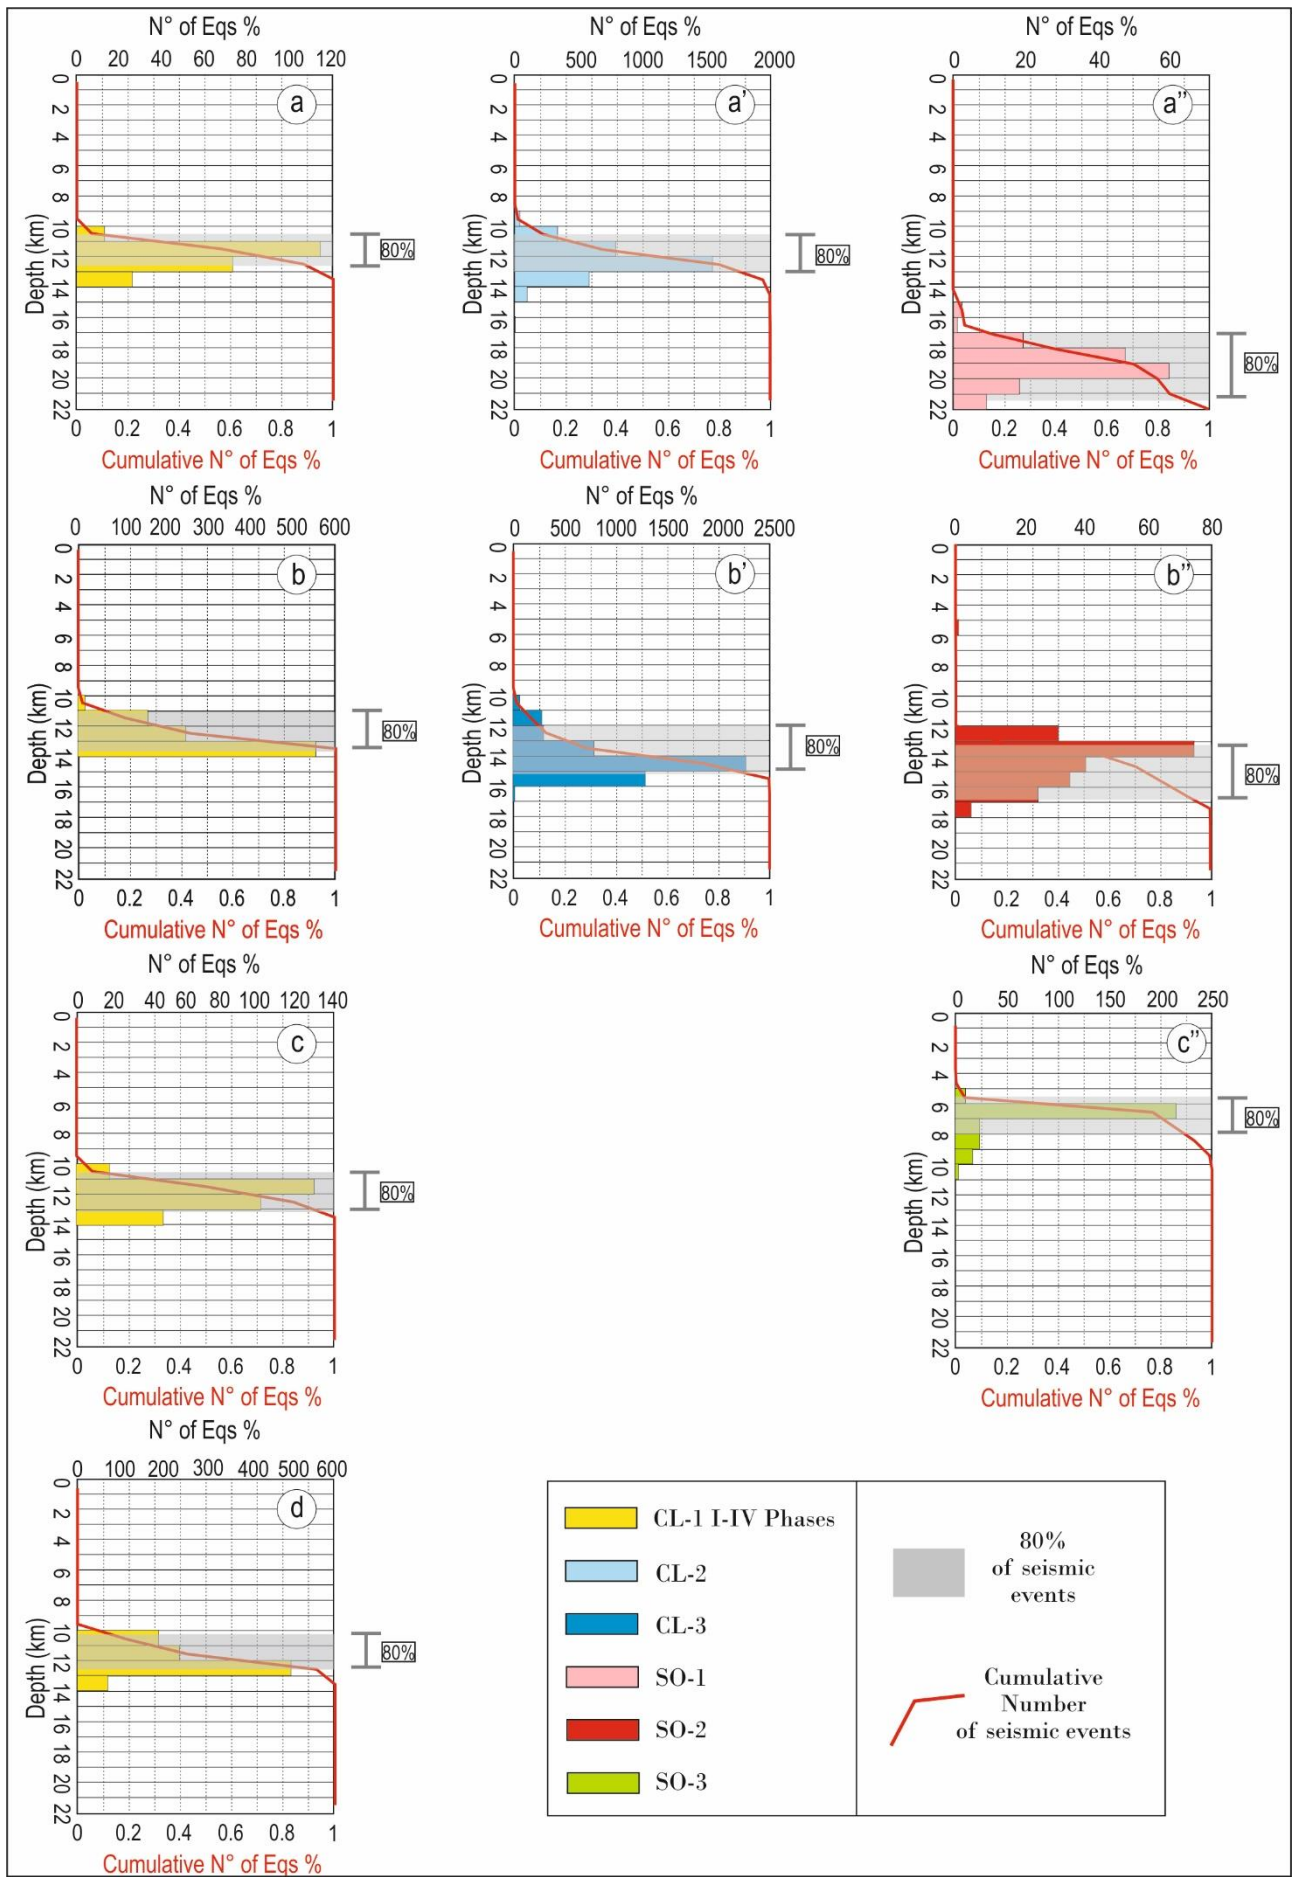

**Figure S7.** Depth distribution of each cluster CL-1, CL-2,3, and SO-1-SO-3.

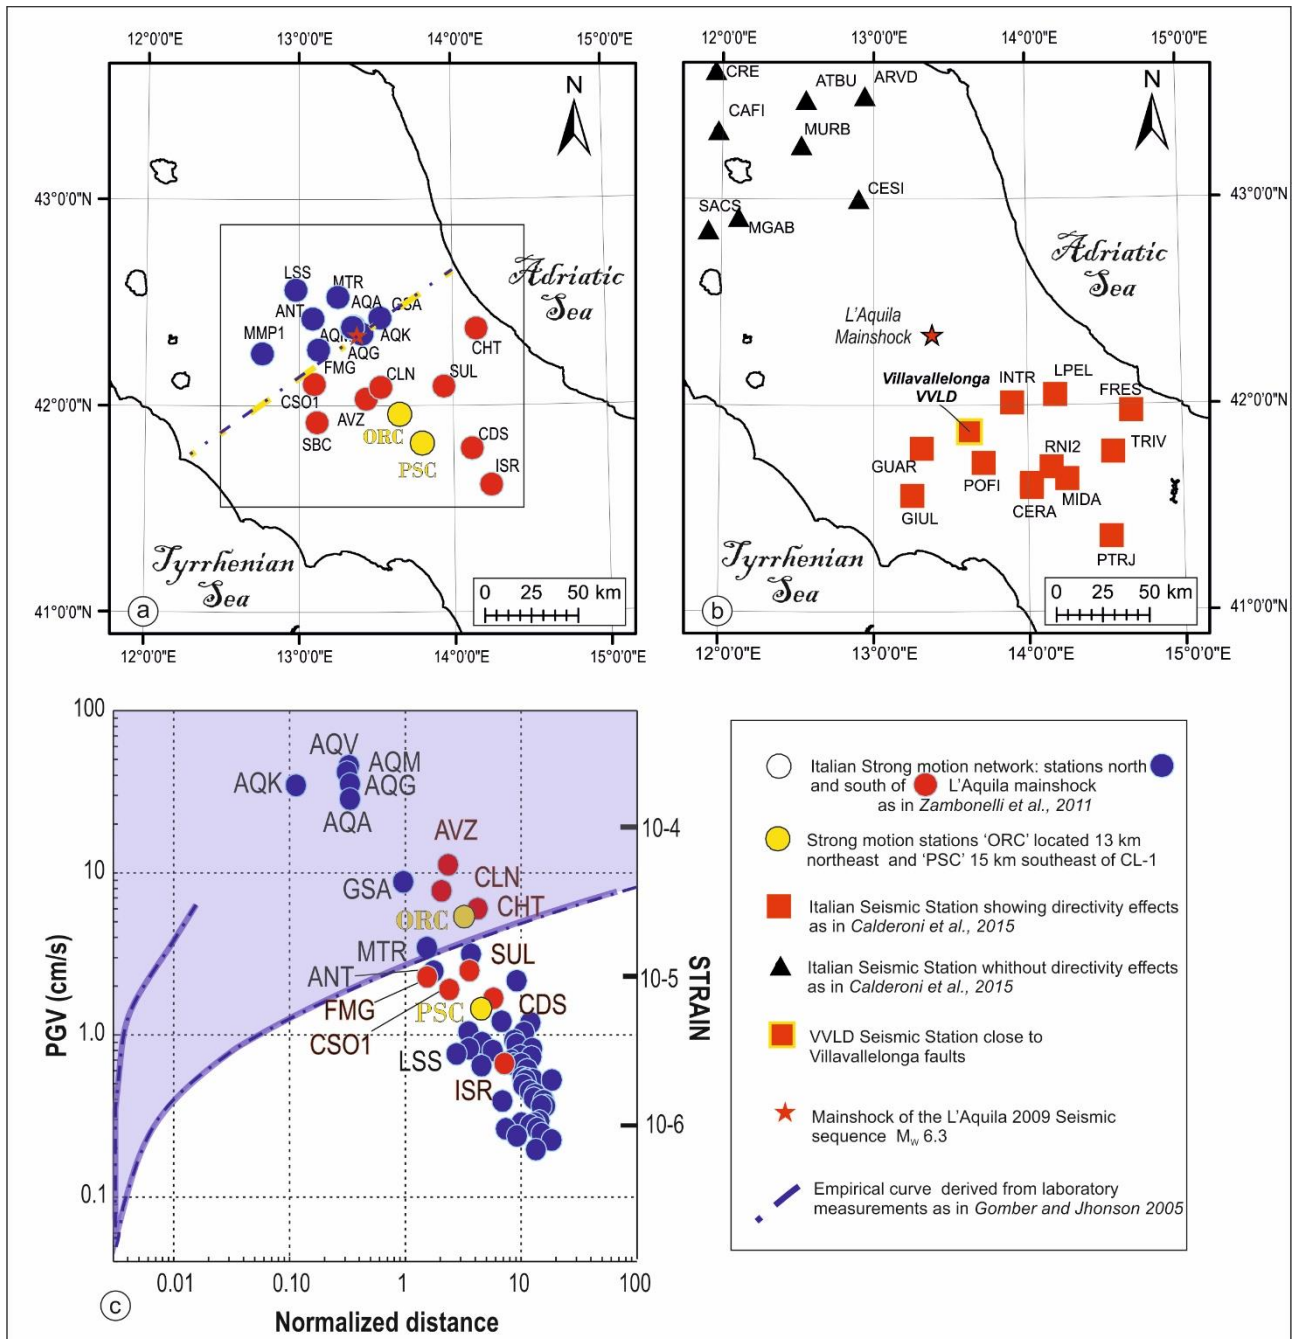

**Figure S8.** Main characteristics of ground motions recorded at the Italian national strong motion and seismic networks after the L'Aquila earthquake M<sub>w</sub> 6.3. (a) Distribution of the strong motion network<sup>12,13</sup> in the study area. (b) Seismic stations of the Italian seismic network showing the directivity effects after the main seismic event of the L'Aquila seismic sequence. (c) Peak Ground Velocity (PGV) versus normalized distance sensu<sup>14</sup>. The normalization was performed considering the square root of the rupture area that can approximate the rupture dimension.

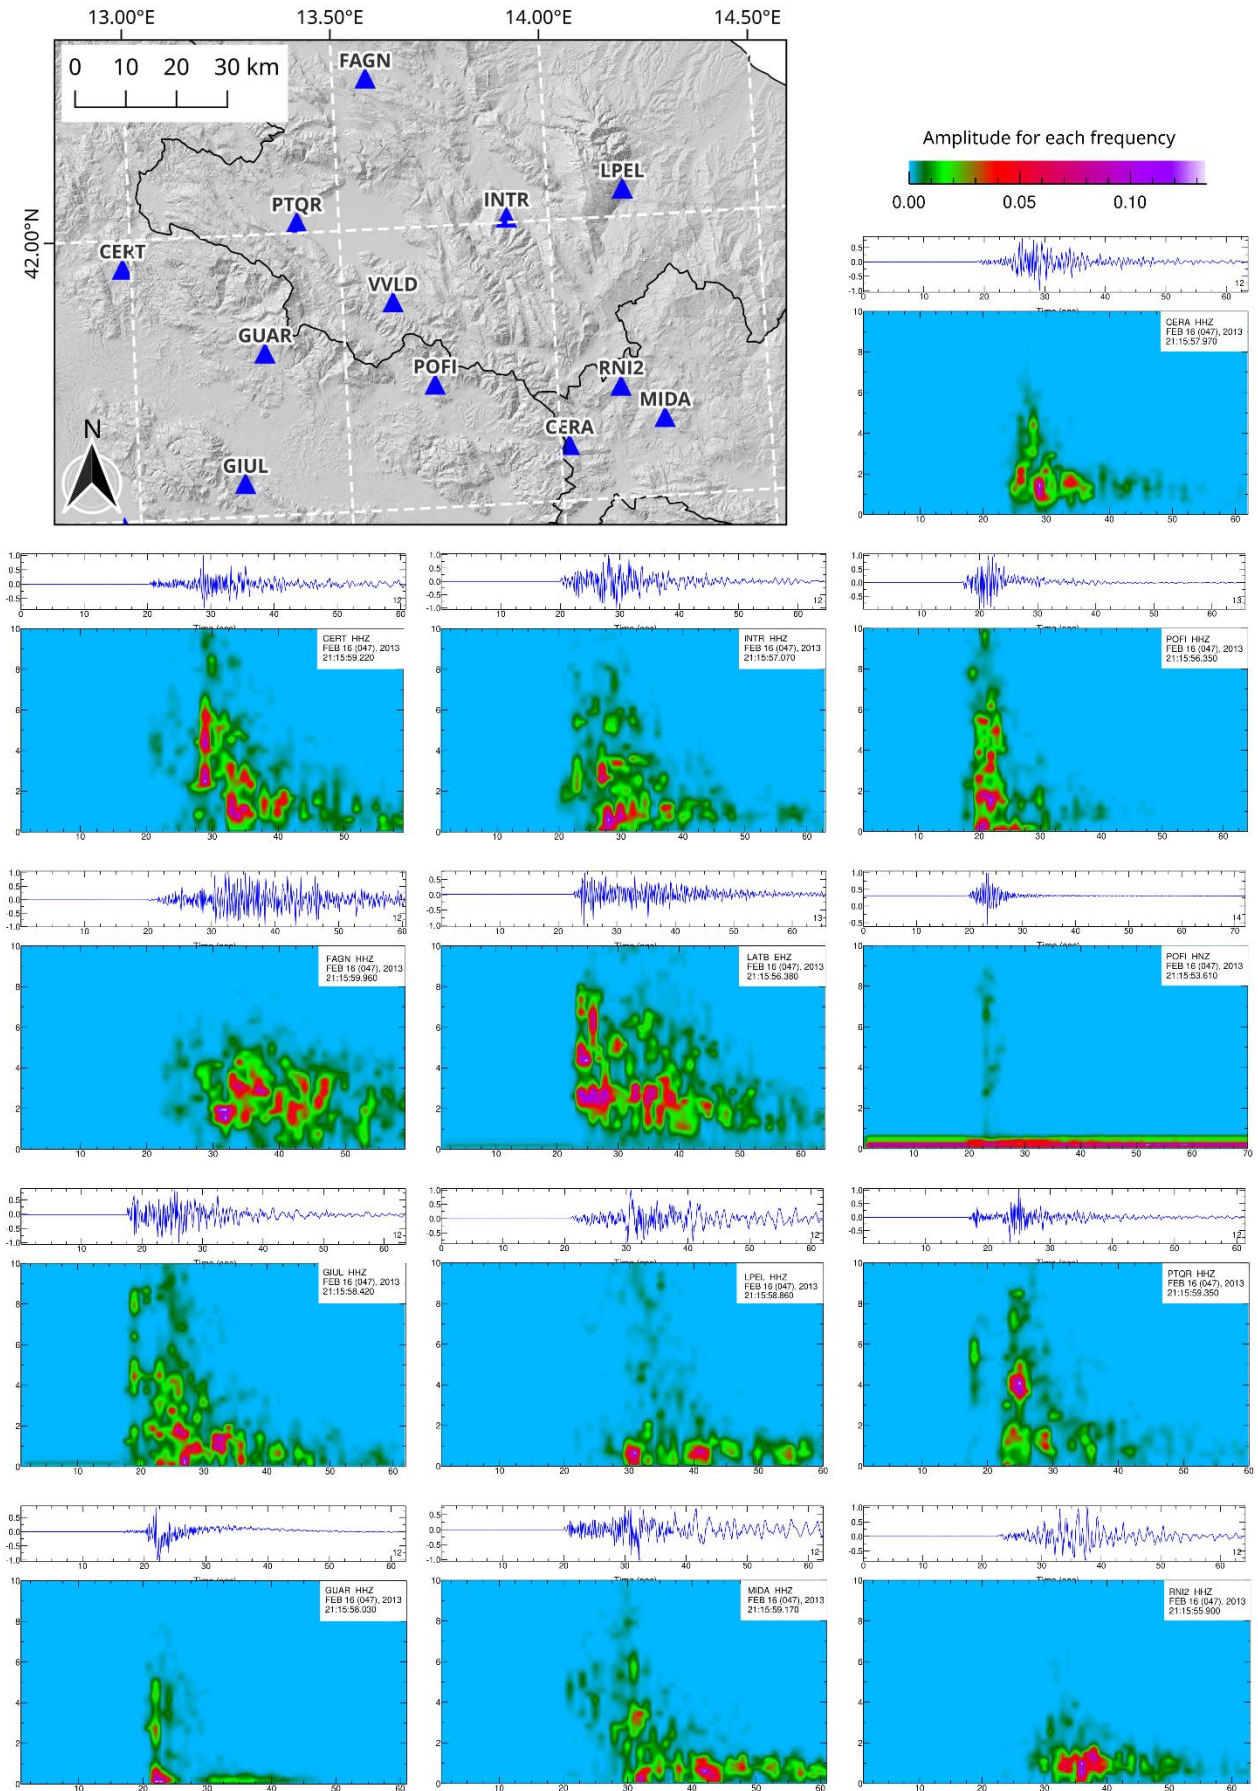

**Figure S9.** Spectrograms of the main event of the Sora earthquake,  $M_w$  4.8, as recorded at the Italian seismic stations shown on the map.

|                       | <i>Phases</i>  | <i>N<sup>•</sup><br/>eqs</i> | <i>Start<br/>(dd/mm/yyyy)</i> | <i>End<br/>(dd/mm/yyyy)</i> | <i>Duration<br/>(days)</i> | <i>n<sup>•</sup><br/>eqs/day</i> | <i>Max<br/>Magnitude<br/>M<sub>L</sub></i> |
|-----------------------|----------------|------------------------------|-------------------------------|-----------------------------|----------------------------|----------------------------------|--------------------------------------------|
| <b>CLUSTER-1</b>      | <i>Phase_1</i> | 226                          | 07/04/2009                    | 04/05/2009                  | 27                         | 8                                | 2.6                                        |
|                       | <i>Phase_2</i> | 984                          | 10/05/2009                    | 25/06/2009                  | 46                         | 21                               | 2.7                                        |
|                       | <i>Phase_3</i> | 294                          | 10/06/2010                    | 22/06/2010                  | 12                         | 25                               | 2.6                                        |
|                       | <i>Phase_4</i> | 978                          | 06/08/2010                    | 09/10/2010                  | 64                         | 15                               | 2.7                                        |
| <b>CLUSTER-2</b>      | --             | 3336                         | 30/09/2009                    | 27/10/2009                  | 27                         | 124                              | 3.6                                        |
| <b>CLUSTER-3</b>      | --             | 5003                         | 04/05/2011                    | 23/05/2011                  | 19                         | 263                              | 2.8                                        |
| <b>CLUSTER-SORA_1</b> | --             | 190                          | 15/02/2013                    | 01/03/2013                  | 14                         | 14                               | 4.8, 5*                                    |
| <b>CLUSTER-SORA_2</b> | --             | 230                          | 17/02/2013                    | 31/03/2013                  | 42                         | 5                                | 3.2                                        |
| <b>CLUSTER-SORA_3</b> | --             | 251                          | 11/03/2013                    | 11/07/2013                  | 122                        | 2                                | 1.9                                        |

**Table S1.** Main characteristics of the analyzed clusters. (\*) Value referred to the M<sub>w</sub> from QRCMT <sup>15</sup>.

| <b>Cluster</b>         | <b>V<sub>p</sub>/V<sub>s</sub></b> | <b>± V<sub>p</sub>/V<sub>s</sub></b> | <b>Diffusivity (D)<br/>m<sup>2</sup>/s</b> | <b>±D<br/>m<sup>2</sup>/s</b> |
|------------------------|------------------------------------|--------------------------------------|--------------------------------------------|-------------------------------|
| CL-1<br><i>Phase 1</i> | 1.877                              | 0.003                                | 0.87                                       | 0.21                          |
| CL-1<br><i>Phase 2</i> | 1.884                              | 0.003                                | 1.63                                       | 0.64                          |
| CL-1<br><i>Phase 3</i> | 1.894                              | 0.002                                | 0.78                                       | 0.27                          |
| CL-1<br><i>Phase 4</i> | 1.922                              | 0.004                                | 0.43                                       | 0.02                          |
| CL-2                   | 1.892                              | 0.002                                | 1.54                                       | 0.09                          |
| CL-3                   | 1.884                              | 0.002                                | --                                         | --                            |
| SO-1                   | 2.067                              | 0.007                                | --                                         | --                            |
| SO-2                   | 1.849                              | 0.009                                | 1.52                                       | 0.26                          |
| SO-3                   | 1.795                              | 0.003                                | 0.42                                       | 0.03                          |

**Table S2.** The values of V<sub>p</sub>/V<sub>s</sub> and diffusivity (D), along with their uncertainties, estimated in this study and related to each cluster.

| Cluster name | Average FM (°) |      |         |      | Kinematic axes (°) |          |         |          |         |          |
|--------------|----------------|------|---------|------|--------------------|----------|---------|----------|---------|----------|
|              | Strike1        | dip1 | Strike2 | dip2 | P-trend            | P-plunge | T-trend | T-Plunge | B-trend | B-plunge |
| CL-1         | 340            | 75   | 70      | 89   | 296                | 10       | 205     | 10       | 72      | 76       |
| CL-2         | 305            | 38   | 127     | 52   | 44                 | 83       | 217     | 7        | 306     | 1        |
| CL-3         | 304            | 37   | 124     | 53   | 34                 | 82       | 214     | 8        | 304     | 0        |
| SO-1*        | 291            | 38   | 165     | 65   | 118                | 59       | 234     | 15       | 331     | 27       |
| SO-2         | 318            | 41   | 145     | 49   | 90                 | 85       | 231     | 4        | 321     | 3        |
| SO-3         | 320            | 42   | 146     | 48   | 93                 | 86       | 233     | 3        | 323     | 3        |

**Table S3.** Average focal mechanisms and kinematics axes were computed for each cluster by using the focal mechanisms in <sup>16</sup>. All the average focal mechanisms are calculated by applying the Bingham statistical procedure <sup>17</sup> used to describe axial data on a sphere when there are no significant differences in magnitude. (\*) The SO-1 average focal mechanism and the respective kinematics axes are evaluated following the moment tensor summation procedure that, conversely, weights the data for the seismic moment.

## References

1. DISS Working Group. Database of Individual Seismogenic Sources (DISS), version 3.3.0: A compilation of potential sources for earthquakes larger than M 5.5 in Italy and surrounding areas. 132 Individual Seismogenic Sources, 197 Composite Seismogenic Sources, 38 Debated Seismogenic Sources, 4 Subduction Zones (2021) doi:10.13127/DISS3.3.0.
2. Cucci, L. & Cinti, F. R. In Search of the 1654 Seismic Source (Central Italy): An Obscure, Strong, Damaging Earthquake Occurred Less than 100 km from Rome and Naples. *Appl. Sci.* **12**, 1150 (2022).
3. Locati, M. *et al.* Database Macrosismico Italiano (DBMI15), versione 4.0. 3229 earthquakes, 123981 Macroseismic Data Points Istituto Nazionale di Geofisica e Vulcanologia (INGV) <https://doi.org/10.13127/DBMI/DBMI15.4> (2022).
4. De Natale, G., Crippa, B., Troise, C. & Pingue, F. Abruzzo, Italy, Earthquakes of April 2009: Heterogeneous Fault-Slip Models and Stress Transfer from Accurate Inversion of ENVISAT-InSAR Data. *Bull. Seismol. Soc. Am.* **101**, 2340–2354 (2011).

5. Lavecchia, G. *et al.* Regional Seismotectonic Zonation of Hydrocarbon Fields in Active Thrust Belts: A Case Study from Italy. in *Building Knowledge for Geohazard Assessment and Management in the Caucasus and other Orogenic Regions* (eds. Bonali, F. L., Pasquaré Mariotto, F. & Tsereteli, N.) 89–128 (Springer Netherlands, Dordrecht, 2021). doi:10.1007/978-94-024-2046-3\_7.
6. Rovida, A., Locati, M., Camassi, R., Lolli, B. & Gasperini, P. The Italian earthquake catalogue CPTI15. *Bull. Earthq. Eng.* **18**, 2953–2984 (2020).
7. Rovida, A. *et al.* Catalogo Parametrico dei Terremoti Italiani (CPTI15), versione 4.0. 4894 earthquakes Istituto Nazionale di Geofisica e Vulcanologia (INGV) <https://doi.org/10.13127/CPTI/CPTI15.4> (2022).
8. Lavecchia, G. *et al.* QUaternary fault strain INdicators database - QUIN 1.0 - first release from the Apennines of central Italy. *Sci. Data* **9**, 204 (2022).
9. Lavecchia, G. *et al.* QUIN 2.0 - new release of the QUaternary fault strain INdicators database from the Southern Apennines of Italy. Zenodo <https://doi.org/10.5281/ZENODO.8414733> (2023).
10. Lavecchia, G., Bello, S., Cirillo, D., Pietrolungo, F. & Brozzetti, F. Quaternary-Host Faults Database 2.0 (Southern Italy). Zenodo <https://doi.org/10.5281/ZENODO.8414479> (2023).
11. ISIDe Working Group. Italian Seismological Instrumental and Parametric Database (ISIDe). (2007) doi:10.13127/ISIDE.
12. Gorini, A. *et al.* The Italian strong motion network. *Bull. Earthq. Eng.* **8**, 1075–1090 (2010).
13. Zambonelli, E., De Nardis, R., Filippi, L., Nicoletti, M. & Dolce, M. Performance of the Italian strong motion network during the 2009, L'Aquila seismic sequence (central Italy). *Bull. Earthq. Eng.* **9**, 39–65 (2011).
14. Gombert, J. & Johnson, P. Dynamic triggering of earthquakes. *Nature* **437**, 830–830 (2005).
15. Silvia Pondrelli, Simone Salimbeni, Paolo Perfetti, & Peter Danecek. Quick regional centroid moment tensor solutions for the Emilia 2012 (northern Italy) seismic sequence. *Ann. Geophys.* **55**, 13 (2012).
16. Frepoli, A. *et al.* Seismic sequences and swarms in the Latium-Abruzzo-Molise Apennines (central Italy): New observations and analysis from a dense monitoring of the recent activity. *Tectonophysics* **712–713**, 312–329 (2017).
17. Allmendinger, R. W., Cardozo, N. & Fisher, D. M. *Structural Geology Algorithms: Vectors and Tensors*. (Cambridge University Press, 2011). doi:10.1017/CBO9780511920202.
